# Supplementary material for: Influence of Mediterranean Diet Adherence and Physical Activity on Bone Health in Celiac Children on a Gluten-Free Diet
Source: MDPI journal article supplement (doi:10.3390/nu13051636), 2021-05-13
Supplement: s1 [file s1]

**Supplementary Table S1.** Body composition differences among the study participants by meeting physical activity guidelines (not meeting versus meeting minimum physical activity recommendations).

|                                                | Not meeting PA<br>recommendations<br>(n=41) | Meeting PA<br>recommendations<br>(n=50) | P <sup>a</sup> | P <sup>b</sup> |
|------------------------------------------------|---------------------------------------------|-----------------------------------------|----------------|----------------|
| Body composition                               |                                             |                                         |                |                |
| <i>Weight (kg)</i>                             | 39.3 (0.8)                                  | 26.6 (0.7)                              | <b>0.013</b>   | <b>0.018</b>   |
| <i>Body mass index (kg/m<sup>2</sup>)</i>      | 18.6 (0.3)                                  | 17.6 (0.3)                              | <b>0.022</b>   | <b>0.032</b>   |
| <i>Fat mass (g)</i>                            | 11392.8 (552.7)                             | 9705.3 (499.8)                          | <b>0.027</b>   | <b>0.037</b>   |
| <i>Fat mass (%)</i>                            | 29.9 (0.9)                                  | 27.4 (0.8)                              | <b>0.033</b>   | <b>0.047</b>   |
| <i>Lean mass (g)</i>                           | 26921.7 (487.7)                             | 24791.9 (441.0)                         | 0.091          | 0.104          |
| <i>Bone mineral content (g)</i>                | 1219.1 (29.6)                               | 1164.9 (26.8)                           | 0.182          | 0.192          |
| <i>Bone mineral density (g/cm<sup>2</sup>)</i> | 0.8 (0.1)                                   | 0.8 (0.1)                               | 0.784          | 0.844          |
| <i>Z-score*</i>                                | -0.6 (0.1)                                  | -0.7 (0.1)                              | 0.594          | 0.519          |

Values are shown as mean (standard error). PA, physical activity. <sup>a</sup>Model adjusted for age, sex and height. <sup>b</sup>Model additionally adjusted for following a gluten-free diet for at least 18 months. \*In model P<sup>a</sup> Z-score was unadjusted.
